# Unsupervised discovery of family specific vocal usage in the Mongolian gerbil

Ralph E Peterson<sup>\*1</sup>, Aman Choudhri<sup>2</sup>, Catalin Mitelut<sup>1</sup>, Aramis Tanelus<sup>1</sup>, Athena Capo-Battaglia<sup>1</sup>, Alex H Williams<sup>1,3</sup>, David M Schneider<sup>1</sup>, Dan H Sanes<sup>1,4,5,6</sup>

1. Center for Neural Science, New York University, New York, NY
2. Columbia University, New York, NY
3. Center for Computational Neuroscience, Flatiron Institute, New York, NY
4. Department of Psychology, New York University, New York, NY
5. Department of Biology, New York University, New York, NY
6. Neuroscience Institute, New York University School of Medicine, New York, NY

For correspondence: rep359@nyu.edu

**Abstract:** Many animal species use vocalizations to communicate social information and previous experiments in rodents have identified a range of vocal types that may be used for this purpose. However, social vocalizations are typically acquired during brief interactions between animals with no prior social relationship, and under environmental conditions with limited ethological relevance. Here, we establish long-term acoustic recordings from Mongolian gerbil families, a core social group that uses an array of sonic and ultrasonic vocalizations which vary with social context. Three separate gerbil families (two parents and four pups) were transferred to an enlarged environment and continuous 20-day audio recordings were obtained. We leveraged deep-learning based unsupervised analysis of 583,237 vocalizations to show that gerbils exhibit a more complex vocal repertoire than has been previously reported. Furthermore, gerbils displayed family-specific vocal repertoires, including differences in vocal type usage and transitions. Since gerbils live naturally as extended families in complex underground burrows that are adjacent to other families, these results suggest the presence of a vocal dialect which could be exploited by animals to represent kinship. These findings offer insight into the naturalistic vocal tendencies of gerbil families and position the Mongolian gerbil as a compelling animal to study the neural basis of vocal communication.

## Introduction

The field of ethology contains rich descriptions of complex behavioral actions, including a wealth of species-specific vocal repertoires. However, natural observations are often incomplete due to limitations in physical access for experimenter observation or behavioral recording. This can be particularly severe for family behaviors which occur in protected or remote environments, such as burrows in the case of fossorial rodent species like naked mole-rats and Mongolian gerbils (Brett 1986; Scheibler 2006). Some of these limitations have been addressed with laboratory environments that partially recapitulate real-world features (Shemesh & Chen 2023). However, these studies generally focused on relatively short periods of data collection that consider single animals or dyads with no prior relationship.

While our understanding of social aural communication is sparse, even for humans (Pagel et al., 2013; Mascar et al., 2018; Schindler et al., 2022), we know that many vocal cues are learned through social experience, and provide pivotal information about an animal's identity. For example, a human infant's ability to discriminate between foreign language phonemes can be preserved by exposure to a live foreign speaker, but not an audiovisual recording (Kuhl et al., 2003). Even some rodents, such as the naked mole rat, model specific calls based on early social experience (Barker et al., 2021). The literature for social facilitation of vocal discrimination or production is particularly strong for zebra finches (Eales, 1989; Derégnaucourt et al., 2013; Chen et al., 2016; Narula et al., 2018). In fact, exposure to a live singing tutor, but not song playback, selectively activates dopamine neurons in the juvenile periaqueductal gray which is thought to mediate learning (Tanaka et al., 2018). Therefore, our study considers the possibility that there is a diversity of vocalizations within the gerbil family social group.

We chose to focus on families, arguably the canonical social group, which has been predominantly studied during brief and experimentally restricted social encounters (e.g., mating, pup retrieval, aggression) in relatively sterile environments. Our goal was to construct a complete gerbil family social-vocal soundscape during a significant period of development under undisturbed conditions. Unlike many laboratory rodents, gerbils form pair bonds and maintain a family structure across generations. These families are composed of a founding adult pair, and up to 15 extended family members that live cooperatively in underground burrows (Ågren et al., 1989a; Ågren et al., 1989b; Milne-Edwards, 1867; Scheibler et al., 2004). Given the darkness and complexity of

their burrow systems, gerbils must rely heavily on their auditory system for survival. Sibling bonds established through adolescence facilitate social structure and minimize inbreeding (Ågren, 1984a). Natural burrows are found in multi-family neighborhoods with strictly enforced territorial boundaries (Scheibler et al., 2006; Ågren et al., 1989a, Ågren et al., 1989b). Like prairie voles, gerbils act cooperatively to hoard food, maintain nests, defend their territory, and care for pups (Elwood, 1975; Gromov, 2021). Therefore, gerbils display a range of rodent-typical behaviors (Hurtado-Parrado et al., 2017), as well as complex family behaviors. Gerbils also display significant vocal communication in both the ultrasonic and sonic ranges (Ter-Mikaelian et al., 2012, Kobayasi & Riquimaroux, 2012) which is likely to be integral to social behaviors. Unlike many other rodent species, gerbils are able to hear within sonic ranges at sensitivities similar to humans (Ryan, 1976). As a result, there is a rich, contemporary literature on the auditory perceptual skills, peripheral and central physiology, central anatomy, learning, and genomics in this species (Budinger and Scheich, 2009; Buran et al., 2014; Happel et al., 2014; Myoga et al., 2014; Pachitariu et al., 2015; Sarro et al., 2015; von Trapp et al., 2016; Caras and Sanes, 2017; Cheng et al., 2019; Zorio et al., 2019; Yao et al., 2020; Amaro et al., 2021; Paraouty et al., 2021; Yao and Sanes, 2021; Saldeitis et al., 2022; Penikis and Sanes, 2023).

Here, we made continuous 20-day audio recordings from three separate gerbil families (2 parents, 4 pups) in an enlarged home cage that was isolated from other gerbils and humans. Specifically, we recorded audio over a period beginning when pup auditory cortex is particularly sensitive to acoustic experience and extending to the time when animals are typically weaned (postnatal days 14-34). Our goal was to acquire a descriptive dataset of the spectrotemporal structure of vocalizations emitted throughout daily family life. Using emerging methods in unsupervised vocalization analysis, we quantitatively describe the spectrotemporal structure of vocalizations over multiple timescales and demonstrate that vocal repertoire usage differs between families.

## Results

### Longitudinal familial audio recording

We obtained acoustic recordings (four microphones, 125 kHz sampling rate) from three separate gerbil families, each containing two adults and four pups (**Figure 1A**).

Continuous recordings began at P14, lasted 20 days, and pups were weaned (P32) two days prior to recording end (**Figure 1B**). As shown in **Figure 1C**, we extracted all sound

events (yellow) using amplitude thresholding of acoustic power. To isolate vocalizations (blue) from non-vocal sounds (red), we computed the spectral flatness of each sound event and classified sounds with a threshold value of  $<0.3$  as vocalizations. A similar approach has previously been used in mice (Castellucci et al., 2016), and we verified that a threshold value of 0.3 minimized the number of false positives (**Figure S1**). Using this approach, 10,267,972 sound events were extracted, containing 583,237 vocalizations and 9,684,735 non-vocal sounds detected across the three families. Sound events were produced at an average rate of  $6,726 \pm 1,260$  times per hour (**Figure 1D**), which reveals the rate of auditory object processing (Griffiths & Warren, 2004) in a naturalistic setting. Vocalizations represent  $6.99 \pm 3.07\%$  of all sound events over the recording period (**Figure 1E**) and were emitted at an average rate of  $405 \pm 103$  times per hour (**Figure 1F**).

### **Unsupervised discovery of the Mongolian gerbil vocal repertoire**

To quantify the full array of vocalizations obtained from the three families, we trained a variational autoencoder (VAE) on vocalization spectrograms. The VAE learned a low-dimensional representation of latent acoustic features, thereby enabling analysis of such a large dataset. **Figure 2A** shows a schematic of the VAE architecture used (Goffinet et al., 2021), where spectrograms (top;  $128 \times 128$  pixels) are reduced via a deep convolutional neural network “encoder” to a latent vector (middle; 32-dimensional). A deep convolutional neural network “decoder” then reconstructs a spectrogram (bottom) from the 32-dimensional latent representation. The encoder/decoder networks are jointly trained to minimize the discrepancy between the original and reconstructed spectrograms (**Figure S2A-B**), resulting in a low-dimensional latent representation, or “code”, which depicts each vocalization. To cluster vocalizations into distinct categories, we trained a Gaussian Mixture Model (GMM) on VAE latent representations. Using a combination of held-out log likelihood and manual inspection, we selected a model with 70 vocal clusters as a parsimonious description of the data (**Figure S2C**). **Figure 2B** shows a UMAP embedding of the VAE latents (center), used for visualization purposes only, which demonstrates that the gerbil vocal repertoire is more discrete than mouse, yet less discrete than zebra finch (Sainburg et al., 2020; Goffinet et al., 2021). Representative examples from 12 monosyllabic vocalization clusters are shown with their relative position in UMAP space, one of which appears similar in form to naked mole rat family specific chirp (blue box with asterisk; Barker et al., 2021). Furthermore, monosyllabic vocalizations (56/70 vocal clusters) can be flexibly strung together to create multisyllabic or “composite” vocalizations (9/70 of vocal clusters; Kobayasi & Riquimaroux, 2012). The remaining 5 clusters contained a mixture of

monosyllabic and multisyllabic vocalizations. **Figure 2C** shows 8 examples of multisyllabic vocalizations and their monosyllabic component boundaries, some of which have been reported previously (Kobayasi & Riquimaroux 2012) and some of which are newly characterized (white asterisks). To assess how family structure influences vocal repertoire usage, we compared vocal usage one day prior and one day after pup weaning, showing a drastic decrease in vocal emission (**Figure S3A**). A large-magnitude vocal repertoire change is also observed, with the repertoire confined to a small region of vocal space following weaning (**Figure S3B-D**).

### **Family specific usage of vocal clusters**

We next asked whether different gerbil families emit different vocalizations during their day-to-day communication. First, we visualized the vocal repertoire usage of each family as a probability density heatmap and determined that vocal repertoire usage significantly differed between families (**Figure 3A, Figure S2D**). Next, using GMM vocalization clusters, we compared the proportion usage of each vocal cluster for the three families, revealing specific vocal cluster differences between families (**Figure 3B**). All families used each of the 70 vocal types (i.e. no cluster usage is 0), but different families relied more heavily on some clusters compared to others. Sorting the GMM cluster labels by the pairwise difference in vocal type usage between families revealed which vocal types differed most (**Figure 3C**). Examples of top overexpressed vocal types for each family are shown in **Figure 3D**. Families overexpress dissimilar vocal types relative to each other (e.g. vocalizations 4 and 8 in Family 2) and similar vocal types relative to each other (e.g. vocalization 14 in Family 1 and vocalization 1 in Family 3; vocalization 9 in Family 1 and vocalization 5 in Family 2).

### **Transition structure, not emission structure, shows family specific differences**

To assess whether temporal features also harbor family differences, we analyzed vocalization emission over a range of ethologically relevant timescales. First, we summed the total vocal emission for each hour of the day over the entire recording period, which revealed a diurnal activity pattern that was similar across the three families recorded (**Figure 4A**). We then analyzed a shorter time scale, the inter-vocalization-interval. The distribution of intervals between subsequent vocalizations is broad, with some vocalizations occurring rapidly after one another (e.g. within tens to hundreds of milliseconds) and others separated by many seconds. The majority of vocalizations occurred in bouts (58.5 +/- 0.9%), which we extracted using two criteria: (1) vocalizations within a bout display inter-vocalization-interval of <2 seconds, and (2) a bout contains at least 5 vocalizations (based on Rose et al., 2021).

The distribution of bout durations, inter-vocalization-intervals, and vocalization durations for each family are highly overlapping and contain the same peaks (**Figure 4B-D**), suggesting that the temporal structure of vocal emission does not vary by family. Vocalization bouts show striking structure in vocal type sequencing (**Figure 4E-F**), therefore we next assessed whether vocal cluster sequencing varied by family. Vocal cluster transition matrices revealed a strong self-transition preference for all vocal clusters across families (**Figure 4G**), however the proportion usage of different transitions (including self-transitions) drastically varied by family (**Figure 4H**).

## Discussion

Understanding the neural mechanisms that support natural behaviors depends upon our ability to quantify specific actions over a range of ethologically relevant contexts and timescales (Miller et al., 2022). In principle, this requires continuous, undisturbed, and longitudinal recording that take place in naturalistic contexts. This need has led to the emergence of a variety of video tools for long-term monitoring, and an associated suite of machine-learning based analyses (Datta et al., 2019; Pereira et al., 2020; Shemesh & Chen, 2023). In contrast, most studies of natural behavior do not acquire and analyze acoustic information over prolonged periods of the life cycle.

Social vocalizations can convey pivotal information about an animal's identity. For example, female macaques learn to recognize the vocalizations of their own offspring during the second postnatal week, and retain this ability for at least 6 months (Jovanovic et al., 2003; Shizawa et al., 2005). Similarly, kittens learn their mother's vocalizations, and Australian sea lions can recall their mother's voice up to 2 years after weaning (Pitcher et al., 2010; Szenczi et al., 2016). Furthermore, the meaning of vocal cues are often learned through long-term social experience. For example, when exposed to a chicken maternal call during development, socially reared mallard ducklings come to prefer it over their own species' call (Gottlieb, 1993). Similarly, wood ducklings must be exposed to sibling vocalizations in order to remain selectively responsive to its mother's assembly call (Gottlieb, 1983). Horseshoe bats, naked mole rats, and dolphins each model their calls based on early social experience (Jones & Ransome, 1993; Fripp et al., 2005; Favaro et al., 2016; Barker et al., 2021). Therefore, there is a compelling rationale for exploring the diversity of vocalizations within the family social group.

Here, we make continuous audio recordings of 3 Mongolian gerbil families for 20 days with the goal of characterizing vocal communication in a significant social group (**Figure 1**). By expanding the recording duration, and permitting animals undisturbed interaction with their family unit, we predicted that we would capture a larger diversity of the gerbil vocal repertoire and sought to determine the repertoire association with family identity. Capitalizing on advances in computational bioacoustics, which aid in the characterization of complex and high-dimensional vocal behavior (Sainburg et al., 2020, 2021; Goffinet 2021), we extracted vocalization spectrograms and used a VAE to perform unsupervised analysis of a large number of familial gerbil vocalizations ( $n=583,237$ ). At least one new vocal type and numerous multisyllabic vocal types were discovered using this approach (**Figure 2**). Also, we provide evidence that family structure is necessary to elicit the full vocal repertoire (**Figure S3**). These findings underscore the advantage of a longitudinal naturalistic approach, and suggest that further elaborations (e.g., providing a larger-scale naturalistic environment) could reveal new aural communication behaviors.

Recent work has shown that rodent vocalizations harbor information about the individual identity and colony membership of the vocalizer (Barker et al. 2021). To address whether gerbils also exhibit family specific vocal features, we compared GMM-labeled vocal cluster usages across the three recorded families and showed differences in vocal type usage (**Figure 3**). The differences align with the definition of human vocal dialect, which is a regional or social variety of language that can differ in pronunciation, grammatical, semantic and/or language use differences (Henry et al., 2015). In our case, vocal clusters can be rarely observed in some families yet highly over-expressed in others (e.g. analogous to language use differences in humans), or highly expressed in both families, but contain subtle spectrotemporal variations (e.g. analogous to pronunciation differences in humans). Like another fossorial species, the naked mole-rat, it's possible that gerbils may also possess the ability to acquire family specific vocal behavior through experience (Barker et al. 2021).

Vocalization emission statistics and behavioral syllable transition patterns can signify differences between groups of animals (Castellucci et al. 2018, Wiltschko et al., 2015, Markowitz et al., 2018). Therefore, it's possible that vocal emission patterns or vocal cluster transition patterns may be family specific. To address this, we first compared vocalization emission rates over multiple ethologically relevant timescales, which revealed highly consistent emission patterns across families (**Figure 4A-D**). First, we observed that vocal emission follows a diurnal pattern, with peaks of activity in the

morning and afternoon. This result complements prior work in gerbils showing diurnal activity patterns in gerbil groups for non-vocal behaviors (Pietrewicz 1982), but extends our understanding to vocal behavior. Vocalizations are rarely emitted in isolation. Rather, they are emitted in sequences (“bouts”) with a modal duration of 4 seconds and a duration distribution that does not vary between families. These emission statistics are somewhat consistent with the common phoneme rate in humans (Edwards and Chang, 2013; Ding et al., 2017). Also, the distributions of inter-vocalization interval and vocalization duration did not differ between families. Taken together, the temporal emission structure is highly consistent across families and suggests that these features are likely not exploited for kinship identification. However, this does not rule out the possibility that the sequential organization of vocalizations could vary. Vocalization bouts (**Figure 1C**, **Figure 4E-F**) show that temporal sequencing of vocalization clusters is non-random and has a compelling transition structure with potential to vary across families. To formally quantify this we calculated vocalization transition matrices for each family, which revealed that all families strongly favor vocalization self-transitions (**Figure 4G**), though hinted that non self-transitions (off-diagonal) vary by family. To visualize this, we generated bigram transition graphs of highly expressed vocalization transitions, which provides evidence that vocalization transition structure varies by family (**Figure 4H**).

These results reveal that Mongolian gerbil families possess a rich repertoire of vocalizations used during day-to-day communication. Our findings indicate that long-term behavioral monitoring of a core social unit (i.e. the family) reveals richer vocal behavior than has previously been reported in the species. Leveraging unsupervised machine learning to quantify vocalizations, we reveal family-specific vocalization usage and transition structure. Taken together, these findings establish the Mongolian gerbil as a useful model organism for studying the neurobiology of vocal interactions in complex social groups.



## Methods

### Experimental animals

Three gerbil families (*Meriones unguiculatus*, n=6 per family: 2 adults, 4 pups) were used in this study (Charles River). All procedures related to the maintenance and use of animals were approved by the University Animal Welfare Committee at New York University, and all experiments were performed in accordance with the relevant guidelines and regulations.

### Audio recording

Four ultrasonic microphones (Avisoft CM16/CMPA48AAF-5V) were synchronously recorded using a National Instruments multifunction data acquisition device (PCI-6143) via BNC connection with a National Instruments terminal block (BNC-2110). The recording was controlled with custom python scripts using the NI-DAQmx library (<https://github.com/ni/nidaqmx-python>) which wrote samples to disk at a 125 kHz sampling rate. In total, 13.084 TB of raw audio data were acquired across the three families. For further analyses, the four-channel microphone signals were averaged to create a single-channel high-fidelity audio signal.

### Audio segmentation

Audio was segmented by amplitude thresholding using the AVA python package (<https://github.com/pearsonlab/autoencoded-vocal-analysis>). First, sound amplitude traces are calculated by computing spectrograms from raw audio, then summing each column of the spectrogram. The “get\_onset\_offsets” function, which performs the segmenting, requires the selection of a number of parameters which affect segmenting performance. The following values were tuned via an interactive procedure which validated that the segmenting could detect low amplitude vocalizations and capture individual vocal units apparent by eye:

```
seg_params = {  
    'min_freq': 500 # minimum frequency  
    'max_freq': 62500, # maximum frequency  
    'nperseg': 512, # FFT  
    'noverlap': 256, # FFT  
    'spec_min_val': -8, # minimum STFT log-modulus  
    'spec_max_val': -7.25, # maximum STFT log-modulus  
    'fs': 125000, # audio sample rate
```

```
'th_1': 2, # segmenting threshold 1
'th_2': 5, # segmenting threshold 2
'th_3': 2, # segmenting threshold 3
'min_dur':0.03, # minimum syllable duration (s)
'max_dur':0.3, # maximum syllable duration (s)
'smoothing_timescale': 0.007, # amplitude
'softmax': False, # apply softmax to the frequency bins to calculate amplitude
'temperature':0.5, # softmax temperature parameter
'algorithm': get_onsets_offsets
}
```

Sound events are detected when the amplitude exceeds 'th\_3', And sound offset occurs when there is a subsequent local minimum (i.e., amplitude less than 'th\_2', or 'th\_1'). The maximum and minimum syllable durations were selected based on published duration ranges of gerbil vocalizations (Ter-Mikaelian et al. 2012, Kobayasi & Riquimaroux, 2012).

### Vocalization extraction

We computed the spectral flatness of each detected sound event using the python package librosa (<https://github.com/librosa>). Consistent with prior literature (Castellucci et al., 2016), we used a threshold on spectral flatness to separate putative vocal and non-vocal sounds. This threshold value was determined empirically, by calculating the false positive vocalization rate (**Figure S1**) of groups of randomly sampled vocalizations. For each spectral flatness value in **Figure S1B**, 100 randomly sampled vocalization spectrograms less than the working threshold value were assembled into 10x10 grids and visually inspected for false positives (e.g. non-vocal sounds; **Figure S1C**). This procedure was repeated 10 times for spectral flatness thresholds of 0.1, 0.15, 0.2, 0.25, 0.3, 0.35, and 0.4. We quantified the false positive vocalization rate for each threshold value and selected 0.3, which had a 5.5 +/- 1.96% false positive rate.

### Variational Autoencoder Training

Extracted vocalizations were converted to 128x128 pixel spectrograms using the “process\_sylls” function from AVA with the following preprocessing parameters:

```
preprocess_params = {
```

```
'get_spec': get_spec, # spectrogram maker
'max_dur': 0.3, # maximum syllable duration
'min_freq': 500, # minimum frequency
'max_freq': 62500, # maximum frequency
'nperseg': 512, # FFT
'noverlap': 256, # FFT
'spec_min_val': -8, # minimum log-spectrogram value
'spec_max_val': -5, # maximum log-spectrogram value
'fs': 125000, # audio sample rate
'mel': False, # frequency spacing, mel or linear
'time_stretch': True, # stretch short syllables?
'within_syll_normalize': False, # normalize spectrogram values on a
                             # spectrogram-by-spectrogram basis
'max_num_syllables': None, # maximum number of syllables per directory
'sylls_per_file': 100, # syllable per file
'real_preprocess_params': ('min_freq', 'max_freq', 'spec_min_val',
                           'spec_max_val', 'max_dur'), # tunable parameters
'int_preprocess_params': ('nperseg', 'noverlap'), # tunable parameters
'binary_preprocess_params': ('time_stretch', 'mel',
                              'within_syll_normalize'), # tunable parameters
}
```

A VAE was trained for 50 epochs using a model precision of 40. We removed additional false positive vocalizations by inspecting a 2D UMAP embedding of the VAE latent space and removing UMAP clusters containing non-vocal sounds from further analysis.

### **Gaussian Mixture Model**

GMMs were fit to cluster VAE latent feature vectors. To reduce computation time, we fit the model on 7 of 32 VAE latents (**Figure S2E**), as these explained 99.5% of the variance in the original feature space. The model was implemented in Stan (<https://mc-stan.org/cmdstanpy>). We fit the model using stochastic variational inference, an approximate Bayesian inference technique that recasts the task of learning a posterior distribution as an optimization problem and enables vast speedups (Hoffman et al., 2013). GMMs typically assume that the whole population selects clusters with the same probabilities, however we modified this assumption to allow, though not enforce, the model to learn different cluster usage patterns for each family. Specifically, we used the following model:

Let  $D$  be the dimensionality of the VAE latents used (in our case,  $D = 7$ ) and  $K$  be the number of clusters. Denote our parameters by:

Mixture means ( $\beta$ ) for cluster  $j$ :  $\beta_j \in \mathbb{R}^D$

Mixture covariance matrix ( $\Sigma$ ) for cluster  $j$ :  $\Sigma_j = [\text{diag}(\sigma_j)]^2$ , for  $\sigma_j \in \mathbb{R}^D$

Cluster usage probabilities for cohort  $i$ :  $\theta_i \in \mathbb{R}^K$ , with  $\sum_{j=1}^K \theta_{i,j} = 1$

Cluster assignment for vocalization  $k$  of cohort  $i$ :  $z_{ik} \in \{1, \dots, K\}$

We selected our hyperparameters according to Stan's guidelines for weakly informative priors, yielding the model:

Mixture means for cluster  $j$ :  $\beta_j \sim \text{Normal}_D(0, 5)$

Mixture standard deviations ( $\sigma$ ) for cluster  $j$ :  $\sigma_j \sim \text{Half-Normal}_D(3)$

Cluster usage probabilities for cohort  $i$ :  $\theta_i \sim \text{Dirichlet}(1, \dots, 1)$

Cluster assignment for vocalization  $k$  of cohort  $i$ :  $z_{ik} \sim \text{Categorical}(\theta_i)$

VAE feature embedding for vocalization  $k$  of cohort  $i$ :  $x_{ik} \sim \text{Normal}(\beta_{(z_{ik})}, \Sigma_{(z_{ik})})$

To select the number of clusters,  $K$ , we held out 25% of our data, trained models with varying values for  $K$ , and calculated the log probability of seeing the held-out data under each model (**Figure S2C**). Combining the held-out log likelihood plot with prior domain knowledge about the number of vocal types and the possibility of variations existing per individual, we selected 70 clusters as the most parsimonious fit. Similar clustering results were achieved using the scikit-learn Gaussian Mixture model class with a diagonal covariance matrix

(<https://scikit-learn.org/stable/modules/generated/sklearn.mixture.GaussianMixture.html>).

### Maximum Mean Discrepancy Permutation Test

Clustering analyses are notoriously challenging (Kleinberg, 2002). Thus, we performed a complementary analysis to investigate whether different gerbil families utilize different vocal repertoires. In particular, we pursued an approach that makes no assumptions about the number, character, or even existence of vocalization clusters.

Specifically, we used maximum mean discrepancy (MMD) to quantify the difference between two latent distributions of vocalizations. This test considers two sets of observed data points (e.g.  $N$  vocalizations from Family 1 and  $N$  vocalizations from

Family 2), which are assumed to be independent and identically distributed random variables from underlying probability distributions, and returns a distance metric corresponding to the equality of the two distributions (Gretton et al., 2012). Lower values suggest distributions are more similar and higher values suggest distributions are more dissimilar. We investigated the null hypothesis that the gerbil families used the same vocal repertoire—i.e. that the probability distribution over VAE latent space for each family was identical, corresponding to a  $\text{MMD}^2$  distance of zero. To test this null hypothesis, we computed the  $\text{MMD}^2$  distance between the empirical distributions of family pairs in batches of 1000 randomly sub-sampled vocalizations. This yielded a histogram of empirically observed  $\text{MMD}^2$  distance values for each family pair, which we compared a null distribution generated by randomly permuting the family label attached to each vocalization. The empirically observed  $\text{MMD}^2$  distances were much higher than the shuffle control, favoring the alternative hypothesis that gerbil families utilize distinct syllable usage statistics (**Figure S2**).

### Transition Analysis

Vocalization transition sequences were generated by concatenating vocal cluster labels chronologically for each family and calculating the number of transitions for all possible transition types. The resulting transition matrix was normalized such that each row sums to 1, thus reflecting the probability that vocalization  $i$  transitions to vocalization  $i + 1$ , i.e.  $p_i(j)$  (**Figure 4G**). The transition matrix used to generate the bigram probability graph in **Figure 4H** was normalized such that edge and node widths correspond to the probability of each vocalization pair, i.e.  $p(i, j)$  (Shannon, 1948).

### Data availability

Data and code are available upon request.

## References

Ågren, G., 1984. Incest avoidance and bonding between siblings in gerbils. *Behavioral Ecology and Sociobiology*, 14, pp.161-169.

Ågren, G., 1984. Pair formation in the Mongolian gerbil. *Animal behaviour*, 32(2), pp.528-535.

Ågren, G., Zhou, Q. and Zhong, W., 1989. Ecology and social behaviour of Mongolian gerbils, *Meriones unguiculatus*, at Xilinhot, Inner Mongolia, China. *Animal Behaviour*, 37, pp.11-27.

Ågren, G., Zhou, Q. and Zhong, W., 1989. Territoriality, cooperation and resource priority: hoarding in the Mongolian gerbil, *Meriones unguiculatus*. *Animal Behaviour*, 37, pp.28-32.

Amaro, D., Ferreiro, D.N., Grothe, B. and Pecka, M., 2021. Source identity shapes spatial preference in primary auditory cortex during active navigation. *Current Biology*, 31(17), pp.3875-3883.

Barker, A.J., Vevjurko, G., Bennett, N.C., Hart, D.W., Mograby, L. and Lewin, G.R., 2021. Cultural transmission of vocal dialect in the naked mole-rat. *Science*, 371(6528), pp.503-507.

Brett, R.A., 1986. The ecology and behaviour of the naked mole-rat, *Heterocephalus glaber* Ruppell (Rodenti: Bathyergidae) (Doctoral dissertation, University College London (University of London)).

Budinger, E. and Scheich, H., 2009. Anatomical connections suitable for the direct processing of neuronal information of different modalities via the rodent primary auditory cortex. *Hearing research*, 258(1-2), pp.16-27.

Buran, B.N., von Trapp, G. and Sanes, D.H., 2014. Behaviorally gated reduction of spontaneous discharge can improve detection thresholds in auditory cortex. *Journal of Neuroscience*, 34(11), pp.4076-4081.

Caras, M.L. and Sanes, D.H., 2017. Top-down modulation of sensory cortex gates perceptual learning. *Proceedings of the National Academy of Sciences*, 114(37), pp.9972-9977.

Castellucci, G.A., McGinley, M.J. and McCormick, D.A., 2016. Knockout of Foxp2 disrupts vocal development in mice. *Scientific reports*, 6(1), p.23305.

Castellucci, G.A., Calbick, D. and McCormick, D., 2018. The temporal organization of mouse ultrasonic vocalizations. *PloS one*, 13(10), p.e0199929.

Chen, Y., Matheson, L.E. and Sakata, J.T., 2016. Mechanisms underlying the social enhancement of vocal learning in songbirds. *Proceedings of the National Academy of Sciences*, 113(24), pp.6641-6646.

Cheng, S., Fu, Y., Zhang, Y., Xian, W., Wang, H., Grothe, B., Liu, X., Xu, X., Klug, A. and McCullagh, E.A., 2019. Enhancement of de novo sequencing, assembly and annotation of the Mongolian gerbil genome with transcriptome sequencing and assembly from several different tissues. *Bmc Genomics*, 20(1), pp.1-6.

Datta, S.R., Anderson, D.J., Branson, K., Perona, P. and Leifer, A., 2019. Computational neuroethology: a call to action. *Neuron*, 104(1), pp.11-24.

Derégnaucourt, S., Poirier, C., Van der Kant, A., Van der Linden, A. and Gahr, M., 2013. Comparisons of different methods to train a young zebra finch (*Taeniopygia guttata*) to learn a song. *Journal of Physiology-Paris*, 107(3), pp.210-218.

Ding, N., Patel, A.D., Chen, L., Butler, H., Luo, C. and Poeppel, D., 2017. Temporal modulations in speech and music. *Neuroscience & Biobehavioral Reviews*, 81, pp.181-187.

Eales, L.A., 1989. The influences of visual and vocal interaction on song learning in zebra finches. *Animal Behaviour*.

Edwards, E. and Chang, E.F., 2013. Syllabic (~ 2–5 Hz) and fluctuation (~ 1–10 Hz) ranges in speech and auditory processing. *Hearing research*, 305, pp.113-134.

Elwood, R.W., 1975. Paternal and maternal behaviour in the Mongolian gerbil. *Animal Behaviour*, 23, pp.766-772.

Favaro, L., Neves, S., Furlati, S., Pessani, D., Martin, V. and Janik, V.M., 2016. Evidence suggests vocal production learning in a cross-fostered Risso's dolphin (*Grampus griseus*). *Animal cognition*, 19, pp.847-853.

Fripp, D., Owen, C., Quintana-Rizzo, E., Shapiro, A., Buckstaff, K., Jankowski, K., Wells, R. and Tyack, P., 2005. Bottlenose dolphin (*Tursiops truncatus*) calves appear to model their signature whistles on the signature whistles of community members. *Animal cognition*, 8, pp.17-26.

Goffinet, J., Brudner, S., Mooney, R. and Pearson, J., 2021. Low-dimensional learned feature spaces quantify individual and group differences in vocal repertoires. *Elife*, 10, p.e67855.

Gottlieb, G., 1983. Development of species identification in ducklings: X. Perceptual specificity in the wood duck embryo requires sib stimulation for maintenance. *Developmental Psychobiology: The Journal of the International Society for Developmental Psychobiology*, 16(4), pp.323-333.

Gottlieb, G., 1993. Social induction of malleability in ducklings: Sensory basis and psychological mechanism. *Animal Behaviour*, 45(4), pp.707-719.

Gretton, A., Borgwardt, K.M., Rasch, M.J., Schölkopf, B. and Smola, A., 2012. A kernel two-sample test. *The Journal of Machine Learning Research*, 13(1), pp.723-773.

Griffiths, T.D. and Warren, J.D., 2004. What is an auditory object?. *Nature Reviews Neuroscience*, 5(11), pp.887-892.

Gromov, V.S., 2021. Ecology and social behaviour of the Mongolian gerbil: a generalised review. *Behaviour*, 159(5), pp.403-441.

Happel, M.F., Niekisch, H., Castiblanco Rivera, L.L., Ohl, F.W., Deliano, M. and Frischknecht, R., 2014. Enhanced cognitive flexibility in reversal learning induced by removal of the extracellular matrix in auditory cortex. *Proceedings of the National Academy of Sciences*, 111(7), pp.2800-2805.



Henry, L., Barbu, S., Lemasson, A. and Hausberger, M., 2015. Dialects in animals: Evidence, development and potential functions. *Animal Behavior and Cognition*, 2(2), pp.132-155.

Hoffman, M.D., Blei, D.M., Wang, C. and Paisley, J., 2013. Stochastic variational inference. *Journal of Machine Learning Research*.

Hurtado-Parrado, C., González-León, C., Arias-Higuera, M.A., Cardona, A., Medina, L.G., García-Muñoz, L., Sánchez, C., Cifuentes, J., Forigua, J.C., Ortiz, A. and Acevedo-Triana, C.A., 2017. Assessing Mongolian gerbil emotional behavior: effects of two shock intensities and response-independent shocks during an extended inhibitory-avoidance task. *PeerJ*, 5, p.e4009.

Jones, G. and Ransome, R.D., 1993. Echolocation calls of bats are influenced by maternal effects and change over a lifetime. *Proceedings of the Royal Society of London. Series B: Biological Sciences*, 252(1334), pp.125-128.

Jovanovic, T., Megna, N.L. and Maestriperi, D., 2000. Early maternal recognition of offspring vocalizations in rhesus macaques (*Macaca mulatta*). *Primates*, 41(4), p.421.

Kleinberg, J., 2002. An impossibility theorem for clustering. *Advances in neural information processing systems*, 15.

Kobayasi, K.I. and Riquimaroux, H., 2012. Classification of vocalizations in the Mongolian gerbil, *Meriones unguiculatus*. *The Journal of the Acoustical Society of America*, 131(2), pp.1622-1631.

Kuhl, P.K., Tsao, F.M. and Liu, H.M., 2003. Foreign-language experience in infancy: Effects of short-term exposure and social interaction on phonetic learning. *Proceedings of the National Academy of Sciences*, 100(15), pp.9096-9101.

Markowitz, J.E., Gillis, W.F., Beron, C.C., Neufeld, S.Q., Robertson, K., Bhagat, N.D., Peterson, R.E., Peterson, E., Hyun, M., Linderman, S.W. and Sabatini, B.L., 2018. The striatum organizes 3D behavior via moment-to-moment action selection. *Cell*, 174(1), pp.44-58.

Mascaro, J.S., Rentscher, K.E., Hackett, P.D., Lori, A., Darcher, A., Rilling, J.K. and Mehl, M.R., 2018. Preliminary evidence that androgen signaling is correlated with men's everyday language. *American Journal of Human Biology*, 30(4), p.e23136.

Miller, C.T., Gire, D., Hoke, K., Huk, A.C., Kelley, D., Leopold, D.A., Smear, M.C., Theunissen, F., Yartsev, M. and Niell, C.M., 2022. Natural behavior is the language of the brain. *Current Biology*, 32(10), pp.R482-R493.

Milne-Edwards, A., 1867. Observations sur quelques mamiferes du nord de la china. *Ann Sci Nat*, 7, pp.375-377.

Myoga, M.H., Lehnert, S., Leibold, C., Felmy, F. and Grothe, B., 2014. Glycinergic inhibition tunes coincidence detection in the auditory brainstem. *Nature communications*, 5(1), p.3790.

Narula, G., Herbst, J.A., Rychen, J. and Hahnloser, R.H., 2018. Learning auditory discriminations from observation is efficient but less robust than learning from experience. *Nature communications*, 9(1), p.3218.

Pachitariu, M., Lyamzin, D.R., Sahani, M. and Lesica, N.A., 2015. State-dependent population coding in primary auditory cortex. *Journal of Neuroscience*, 35(5), pp.2058-2073.

Pagel, M., Atkinson, Q.D., S. Calude, A. and Meade, A., 2013. Ultraconserved words point to deep language ancestry across Eurasia. *Proceedings of the National Academy of Sciences*, 110(21), pp.8471-8476.

Paraouty, N., Rizzuto, C.R. and Sanes, D.H., 2021. Dopaminergic signaling supports auditory social learning. *Scientific reports*, 11(1), pp.1-13.

Penikis, K.B. and Sanes, D.H., 2023. A redundant cortical code for speech envelope. *Journal of Neuroscience*, 43(1), pp.93-112.

Pereira, T.D., Shaevitz, J.W. and Murthy, M., 2020. Quantifying behavior to understand the brain. *Nature neuroscience*, 23(12), pp.1537-1549.

Pietrewicz, A.T., Hoff, M.P. and Higgins, S.A., 1982. Activity rhythms in the Mongolian gerbil under natural light conditions. *Physiology & Behavior*, 29(2), pp.377-380.

Pitcher, B.J., Harcourt, R.G. and Charrier, I., 2010. The memory remains: long-term vocal recognition in Australian sea lions. *Animal cognition*, 13, pp.771-776.

Rose, M.C., Styr, B., Schmid, T.A., Elie, J.E. and Yartsev, M.M., 2021. Cortical representation of group social communication in bats. *Science*, 374(6566), p.eaba9584.

Ryan, A., 1976. Hearing sensitivity of the mongolian gerbil, *Meriones unguiculatus*. *The Journal of the Acoustical Society of America*, 59(5), pp.1222-1226.

Sainburg, T., Thielk, M. and Gentner, T.Q., 2020. Finding, visualizing, and quantifying latent structure across diverse animal vocal repertoires. *PLoS computational biology*, 16(10), p.e1008228.

Sainburg, T. and Gentner, T.Q., 2021. Towards a computational neuroethology of vocal communication: from bioacoustics to neurophysiology, emerging tools and future direction. *Frontiers in Behavioral Neuroscience*, p.330.

Saldeitis, K., Jeschke, M., Michalek, A., Henschke, J.U., Wetzel, W., Ohl, F.W. and Budinger, E., 2022. Selective Interruption of Auditory Interhemispheric Cross Talk Impairs Discrimination Learning of Frequency-Modulated Tone Direction But Not Gap Detection and Discrimination. *Journal of Neuroscience*, 42(10), pp.2025-2038.

Sarro, E.C., von Trapp, G., Mowery, T.M., Kotak, V.C. and Sanes, D.H., 2015. Cortical synaptic inhibition declines during auditory learning. *Journal of Neuroscience*, 35(16), pp.6318-6325.

Scheibler, E., Weinandy, R. and Gattermann, R., 2004. Social categories in families of Mongolian gerbils. *Physiology & behavior*, 81(3), pp.455-464.

Scheibler, E., Liu, W., Weinandy, R. and Gattermann, R., 2006. Burrow systems of the Mongolian gerbil (*Meriones unguiculatus* Milne Edwards, 1867). *Mammalian Biology*, 71, pp.178-182.

Schindler, D., Spors, S., Demiray, B. and Krüger, F., 2022. Automatic Behavior Assessment from Uncontrolled Everyday Audio Recordings by Deep Learning. *Sensors*, 22(22), p.8617.

Shannon, C.E., 1948. A mathematical theory of communication. *The Bell system technical journal*, 27(3), pp.379-423.

Shemesh, Y. and Chen, A., 2023. A paradigm shift in translational psychiatry through rodent neuroethology. *Molecular Psychiatry*, pp.1-11.

Shizawa, Y., Nakamichi, M., Hinobayashi, T. and Minami, T., 2005. Playback experiment to test maternal responses of Japanese macaques (*Macaca fuscata*) to their own infant's call when the infants were four to six months old. *Behavioural processes*, 68(1), pp.41-46

Szenczi, P., Bánszegi, O., Urrutia, A., Faragó, T. and Hudson, R., 2016. Mother-offspring recognition in the domestic cat: Kittens recognize their own mother's call. *Developmental Psychobiology*, 58(5), pp.568-577.

Tanaka, M., Sun, F., Li, Y. and Mooney, R., 2018. A mesocortical dopamine circuit enables the cultural transmission of vocal behaviour. *Nature*, 563(7729), pp.117-120.

Ter-Mikaelian, M., Rübsamen, R. and Yapa, W.B., 2012. Vocal behavior of the Mongolian gerbil in a seminatural enclosure. *Behaviour*, 149(5), pp.461-492.

von Trapp, G., Buran, B.N., Sen, K., Semple, M.N. and Sanes, D.H., 2016. A decline in response variability improves neural signal detection during auditory task performance. *Journal of Neuroscience*, 36(43), pp.11097-11106.

Wiltschko, A.B., Johnson, M.J., Iurilli, G., Peterson, R.E., Katon, J.M., Pashkovski, S.L., Abaira, V.E., Adams, R.P. and Datta, S.R., 2015. Mapping sub-second structure in mouse behavior. *Neuron*, 88(6), pp.1121-1135.

Yao, J.D. and Sanes, D.H., 2021. Temporal encoding is required for categorization, but not discrimination. *Cerebral Cortex*, 31(6), pp.2886-2897.

Yao, J.D., Gimoto, J., Constantinople, C.M. and Sanes, D.H., 2020. Parietal cortex is required for the integration of acoustic evidence. *Current Biology*, 30(17), pp.3293-3303.

Zorio, D.A., Monsma, S., Sanes, D.H., Golding, N.L., Rubel, E.W. and Wang, Y., 2019. De novo sequencing and initial annotation of the Mongolian gerbil (*Meriones unguiculatus*) genome. *Genomics*, 111(3), pp.441-449.

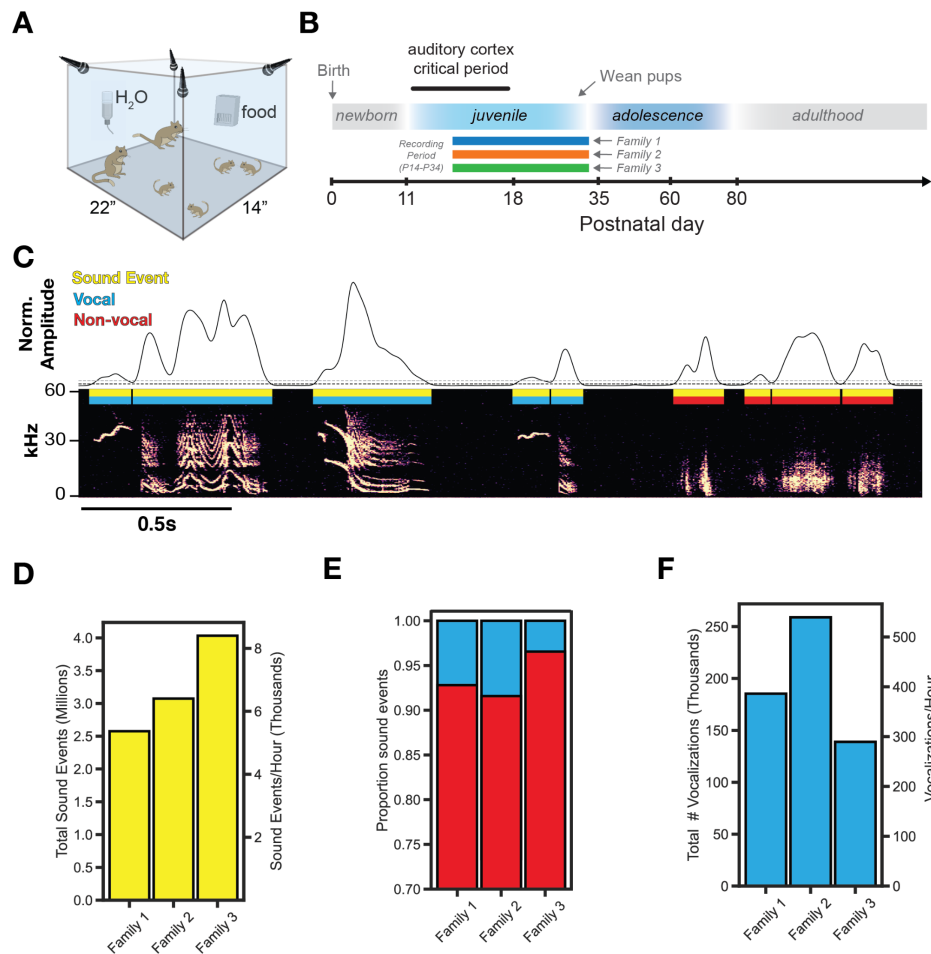

**Figure 1. Longitudinal familial audio recording.** (A) Recording apparatus. Four ultrasonic microphones sampled at 125 kHz continuously recorded a family in an enlarged environment. (B) Experiment timeline. Three gerbil families with the same family composition (2 adults, 4 pups) were recorded continuously for 20 days. (C) Extraction of sound events from raw audio using sound amplitude thresholding (Gray threshold = “th<sub>2</sub>”, black threshold = “th<sub>1</sub>” and “th<sub>3</sub>”; see Methods). Vocalizations (n=583,237) are separated from non-vocal sounds (n=9,684,735) using a threshold on spectral flatness (**Figure S1**, see methods). (D) Summary of total sound event emission and average emission per hour. (E) Proportion of all sound events that are vocal or non-vocal sounds. (F) Summary of total vocalization emission and average emission per hour.

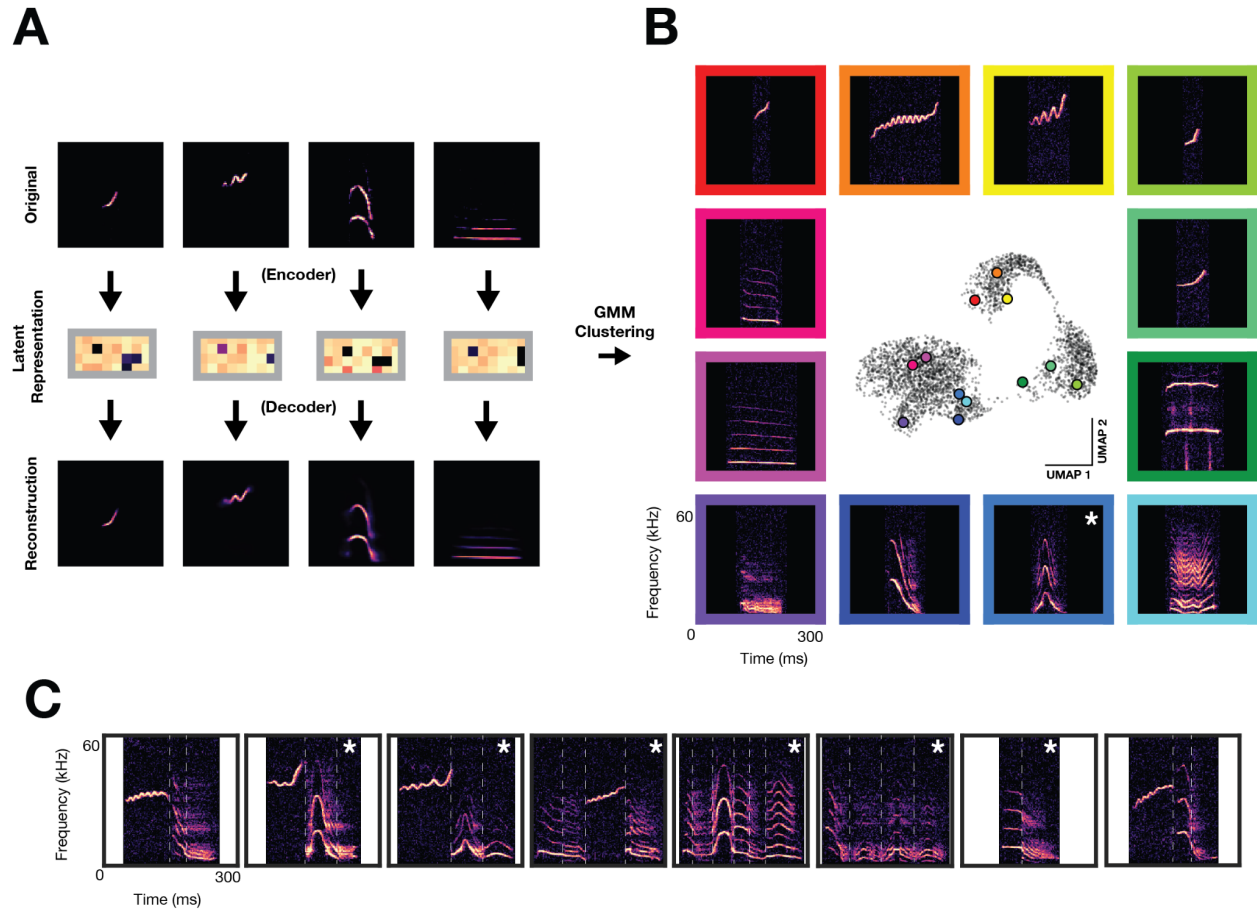

## Figure 2. Unsupervised discovery of the Mongolian gerbil vocal repertoire.

Variational autoencoder and clustering. (A) Vocalization spectrograms (top) are input to a variational autoencoder (VAE) which encodes the spectrogram as a 32-D set of latent features (middle). The VAE learns latent features by minimizing the difference between original spectrograms and spectrograms reconstructed from the latent features by the VAE decoder (bottom). A gaussian mixture model (GMM) was trained on the latent features to cluster vocalizations into discrete categories. (B) Representative vocalizations from 12 distinct GMM clusters featuring monosyllabic vocalizations are shown surrounding a UMAP embedding of the latent features. Asterisk denotes vocal type not previously characterized. (C) Examples of multisyllabic vocalizations. White vertical lines indicate boundaries of monosyllabic elements. Asterisks denote multisyllabic vocal types not previously characterized.

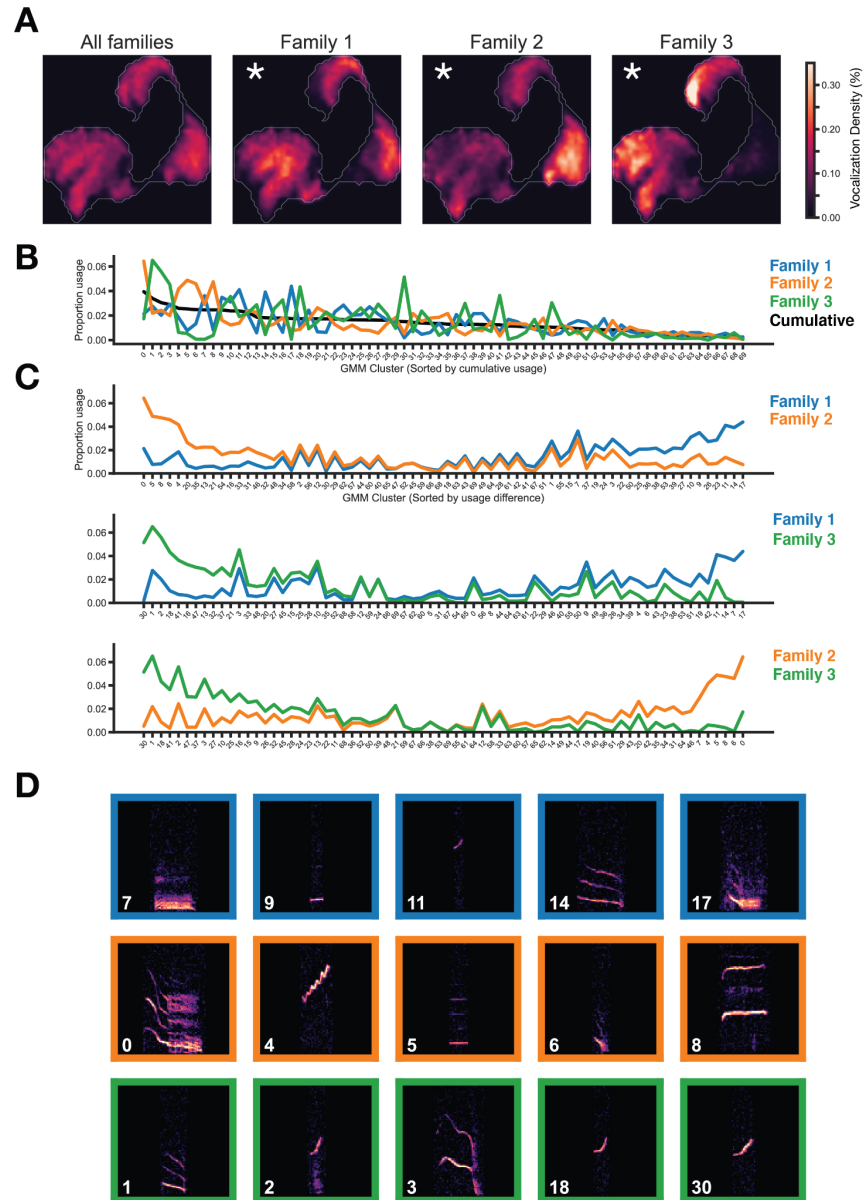

**Figure 3. Family specific vocal usage.** (A) UMAP probability density plots (axes same as Figure 2B) show significant differences between family repertoires ( $p < 0.01$ , MMD permutation test on latent space; see Methods). (B) Vocal type usage by family. Clusters sorted by cumulative usage across all families. Families show distinct usage patterns of different vocal clusters. (C) Clusters are resorted by the usage difference between families. (D) Spectrogram examples from top differentially used clusters.



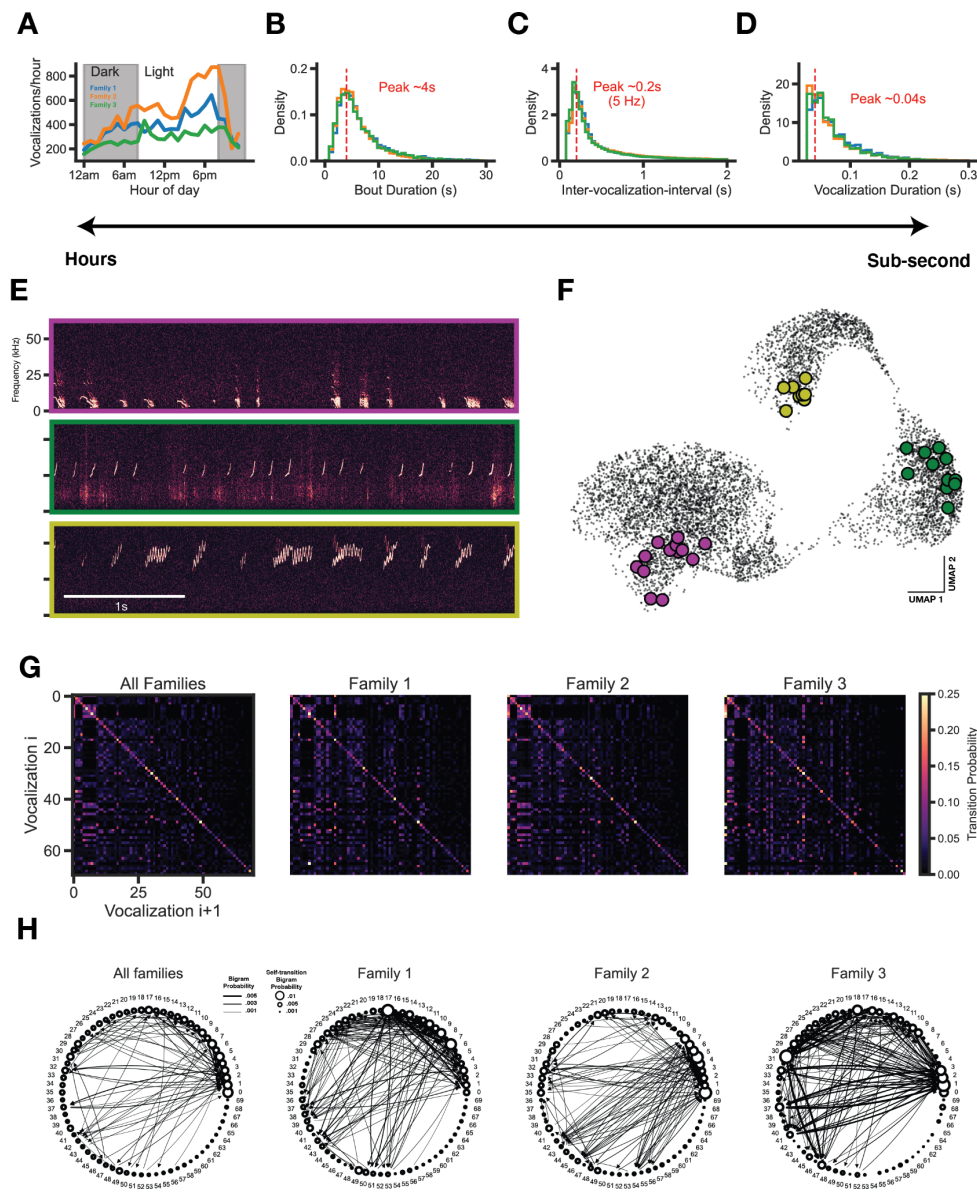

**Figure 4. Transition structure, not emission structure, shows family specific differences.** (A) Vocalizations are emitted in a diurnal cycle. (B) Vocalizations consistently occur in seconds-long bouts across families. (C) Vocalization intervals (onset-to-onset) are consistent across families. (D) Vocalization durations are consistent across families. (E) Raw data examples of bouts. (F) Bouts typically occupy a similar area of vocal space. (G) Vocal cluster transition matrix. Vocalizations strongly favor self-transition. (H) Bigram probability graph. Self and other vocalization transition tendencies show family specific transitions (edges > 0.001 usage shown).

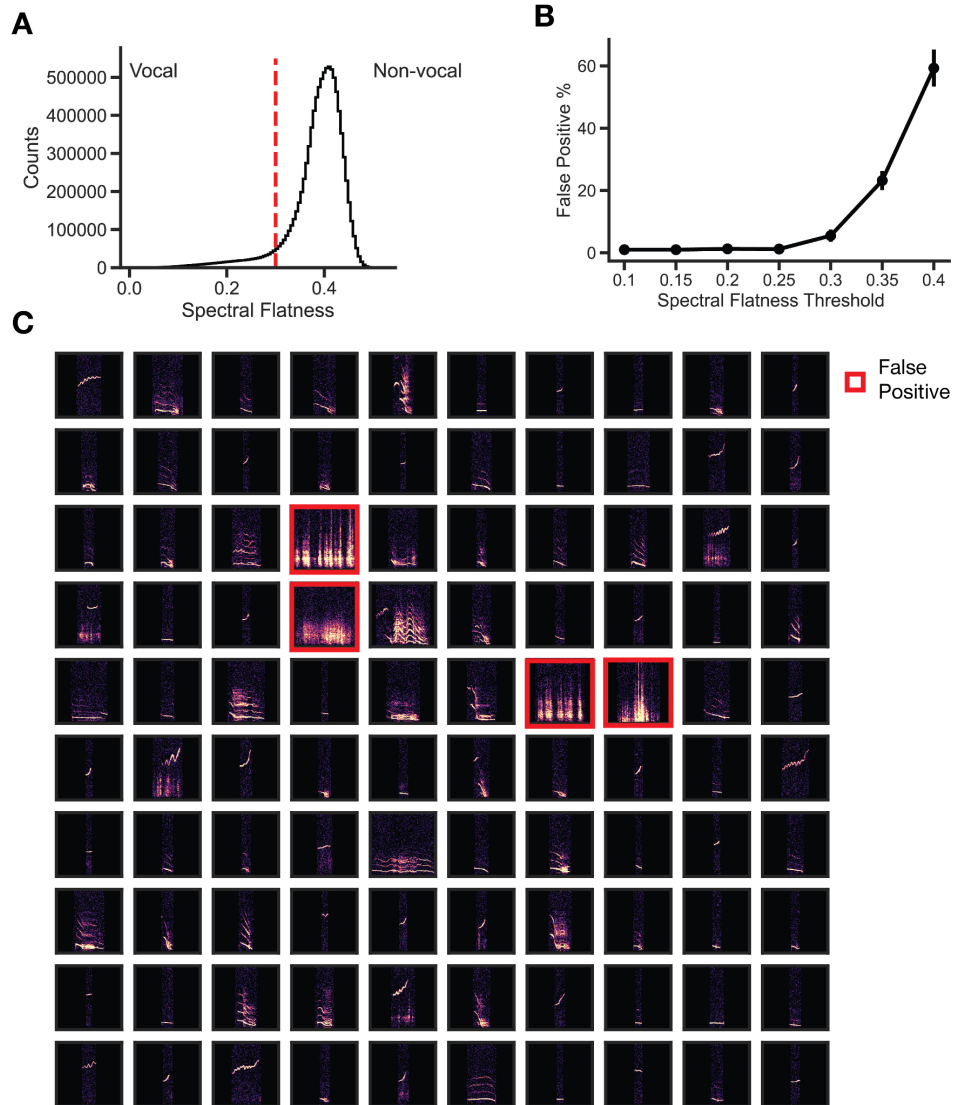

**Figure S1. Vocalization extraction.** (A) Distribution of the spectral flatness of all sound events extracted. Vertical red line = 0.3. (B) False-positive percentage derived from human labeling of noise detected in randomly sampled 10x10 vocalization matrices. Random samples came from putative vocalizations with spectral flatness less than a moving threshold of 0.1, 0.15, 0.2, 0.25, 0.3, 0.35, 0.4 (n=10 random samples per group). (C) Example random sample matrix of vocalizations with spectral flatness <0.3. Four false positives observed in this grid.

**A**

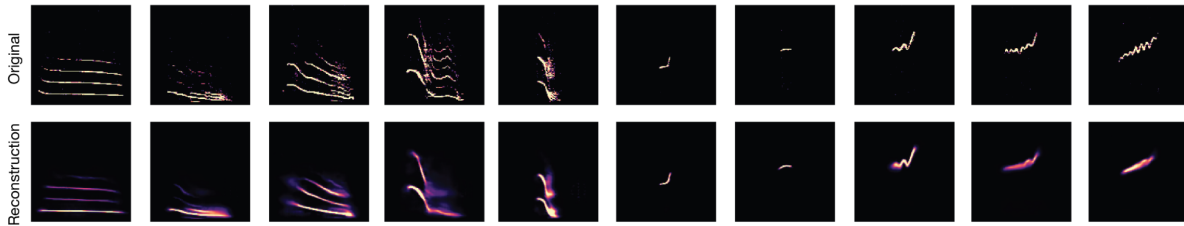

**B**

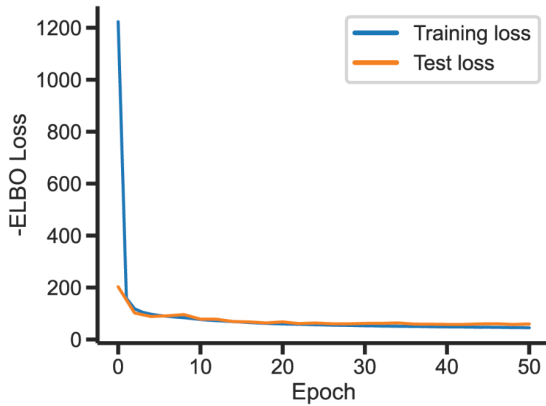

**C**

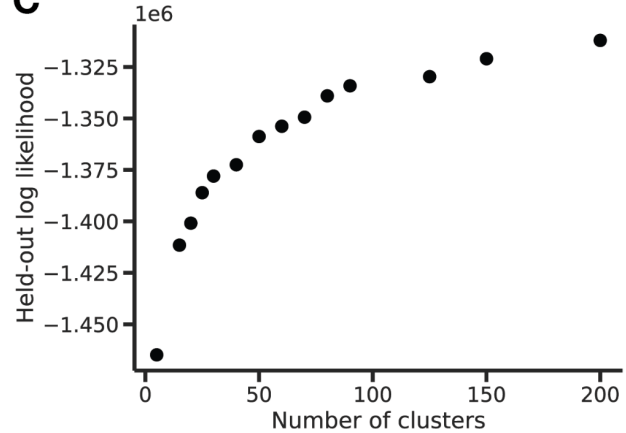

**D**

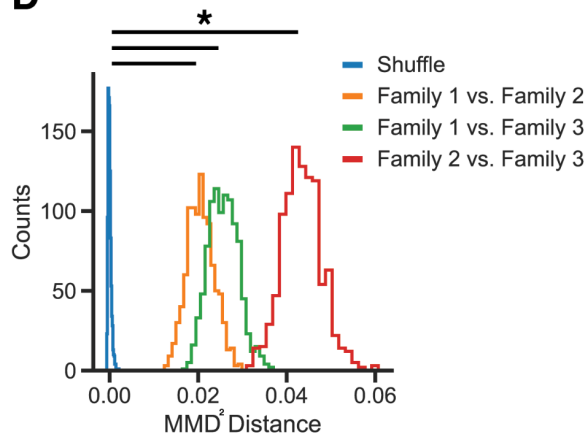

**E**

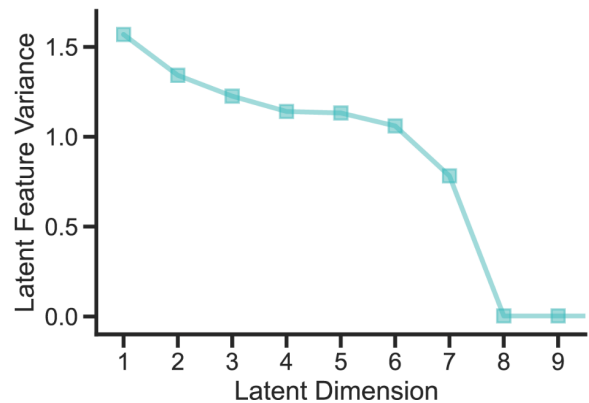

**Figure S2. VAE training and GMM clustering.** (A) VAE reconstruction examples for different vocalization types. (B) VAE test and training loss show plateau in performance after a few epochs (model used in this study is epoch 50). (C) GMM held-out log likelihood as a function of the number of clusters used during model training. Seventy clusters were used in this study. (D)  $MMD^2$  permutation comparisons. All family comparisons occur greater than expected by chance ( $p < 0.01$ , independent t-test). (E) Number of latent features used by VAE.

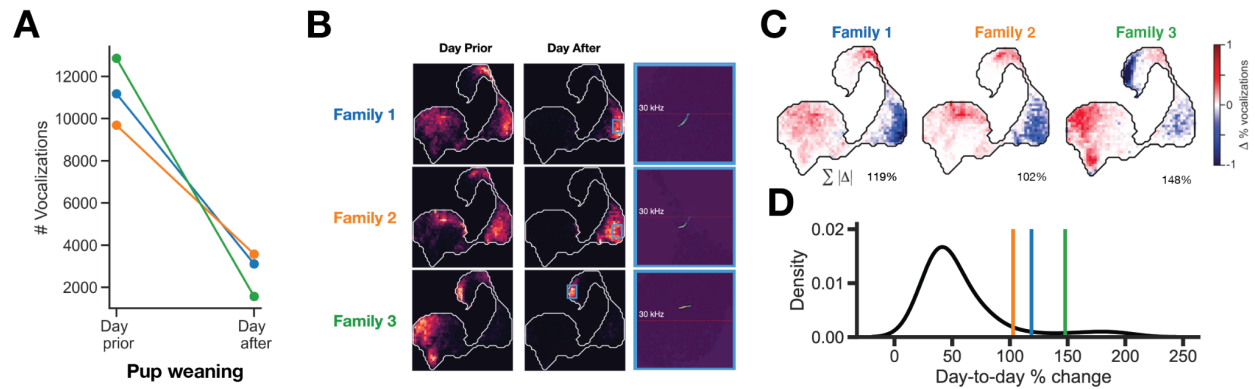

**Figure S3. Pup removal biases vocal repertoire usage.** (A) Pup weaning causes a consistent reduction in vocal emission across families. (B) UMAP probability densities of the vocal repertoire pre and post pup weaning. Example vocalization from high density post-weaning regions. (C.) Difference in probability densities and total percent-change in repertoire pre-post pup weaning. (D) Quantification of day-to-day percent-change throughout the experiment shows that the percent-change magnitude observed in C is rare.
